# Supplementary material for: NAMPT-dependent NAD+ biosynthesis controls circadian metabolism in a tissue-specific manner
Source: PubMed Central journal article supplement (PMC10083581; doi:10.1073/pnas.2220102120), 2023-03-30
Supplement: pnas.2220102120.sapp.pdf [file pnas.2220102120.sapp.pdf]

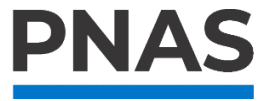

**Supporting Information for**  
NAMPT-dependent NAD<sup>+</sup> biosynthesis controls circadian metabolism  
in a tissue-specific manner

Astrid L. Basse, Karen N. Nielsen, Iuliia Karavaeva, Lars R. Ingerslev, Tao Ma, Jesper F. Havelund, Thomas S. Nielsen, Mikkel Frost, Julia Peics, Emilie Dalbram, Morten Dall, Juleen R. Zierath, Romain Barrès, Nils J. Færgeman, Jonas T. Treebak, Zachary Gerhart-Hines

Jonas T. Treebak and Zachary Gerhart-Hines  
Email: [jttreebak@sund.ku.dk](mailto:jttreebak@sund.ku.dk) or [zpg@sund.ku.dk](mailto:zpg@sund.ku.dk)

**This PDF file includes:**

Supporting Information on Materials and methods  
Figures S1 to S4  
Legends for Datasets S1 to S3  
SI References

**Other supporting materials for this manuscript include the following:**

Datasets S1 to S3

## Supporting Information on Materials and methods

### Gene expression, Primers

| Gene         | Forward                | Reverse                |
|--------------|------------------------|------------------------|
| <i>Arntl</i> | TAGGATGTGACCGAGGGAAG   | TCAAACAAGCTCTGGCCAAT   |
| <i>Clock</i> | CCCTTCCTCCACACCGACA    | GGACGACCTCCGCTGTGT     |
| <i>Cry1</i>  | CCATCCGCTGCGTCTATATC   | AAGCAAAAATCGCCACCTGT   |
| <i>Cry2</i>  | CCATCGTCAATCATGCAGAG   | CCACACAGGAAGGGACAGAT   |
| <i>Drp1</i>  | ACCGGGATCAGCGCCTCCAT   | CAAGCGGGCTGTGGGTTCGAG  |
| <i>Nampt</i> | TGCCGTGAAAAGAAGACAGA   | ACTTCTTTGGCCTCCTGGAT   |
| <i>Npas2</i> | AAGGATAGAGCAAAGAGAGCCT | CATTTTCCGAGTGTTACCAGGG |
| <i>Nr1d1</i> | GTCTCTCCGTTGGCATGTCT   | CCAAGTTCATGGCGCTCT     |
| <i>Per2</i>  | CCAGCTGCTAATGTCCAGTG   | ACAGCAAACATATCCGCGTT   |
| <i>Ucp2</i>  | GCGCCTTCTACAAGGGGTTCC  | CTCCCGAGATTGGTAGGCAG   |
| <i>Ucp3</i>  | TGACCTGCGCCCAGC        | CCCAGGCGTATCATGGCT     |

### Western blot analysis

Protein was extracted from mouse adipose tissues and skeletal muscle by steel bead homogenization (Tissue Lyser II, Qiagen) in an ice-cold lysis buffer for adipose tissue (RIPA lysis buffer (20-188, Millipore), 0.1% SDS) and skeletal muscle (pH 7.4, 10% glycerol, 1% IGEPAL, 50 mM Hepes, 150 mM NaCl, 10 mM NaF, 1 mM EDTA, 1 mM EGTA, 20 mM sodium pyrophosphate, 2 mM sodium orthovanadate, 5 mM nicotinamide, 4  $\mu$ M Thiamet G, and protease inhibitors (SigmaFast)). Homogenates were incubated on ice for 30 min (adipose tissue) or run end-over-end for 45 min at 4°C (skeletal muscle), followed by centrifugation at 16,000  $g$  at 4°C for 15 min. The supernatant was stored in aliquots at 80°C until further analysis. Protein concentration was measured by BCA (23223 and 23224, Thermo Scientific). Western blot analyses were performed as described (1). Protein abundance was detected by immunoblotting using antibody for NAMPT (A300–372A, Bethyl).

### RNA sequencing

Read summation onto genes was performed by featureCounts v. 1.5.3 (2). Differential expression testing was performed with edgeR (3). The model used for differential expression testing was of the form  $\sim 0 + group + group:(ZT\_sin + ZT\_cos)$ , where *group* encoded both tissue and genotype, and the parameters *ZT\_sin* and *ZT\_cos* are sine and cosine terms describing time, as generated by LimoRhyde (4). Circadianicity was found by testing for significance of the sine and cosine components. Differential rhythmicity was found by testing for differences in the sine and cosine components. All tests used the quasi-likelihood tests in edgeR. Gene ontology enrichment tests were performed using the topGO package (5).

Heatmaps were generated using the pheatmap package (6), amplitudes were Z-score transformed prior to plotting. Overlaps between groups was visualized using upset plots from the UpSetR package (7) and visualization of gene ontologies was performed by the dotplot function from the enrichplot package (8). The remaining figures were generated by the ggplot2 package of R (9). Predicted expression patterns, time of peak and amplitudes were calculated based on the parameters fitted by edgeR.

### Metabolomics

Metabolites from BAT and eWAT were extracted in methanol:acetonitrile:water (5:3:2, 250  $\mu$ L per 25 mg of tissue). Samples were sonicated, thoroughly vortexed, and centrifuged (16,000  $g$ , 20 min, 4°C). From this, 100  $\mu$ L supernatant was transferred to new tubes before lyophilization. BAT and eWAT samples were resuspended in 20  $\mu$ L and 35  $\mu$ L of 1% formic acid, respectively, spun down to remove debris, and transferred to HPLC vials. An aliquot (5  $\mu$ L) of each BAT and eWAT sample was transferred to a tissue-specific pool and used for quality control (QC).

Profiling of BAT and eWAT samples was conducted as described (10), with LC-MS and RP separation on an Agilent 1290 Infinity HPLC system (Agilent Technologies, Santa Clara, CA)

equipped with an Agilent Zorbax Eclipse Plus C18 column (2.1 x 150 mm, 1.8 mm) with a 50 mm guard-column.

Raw data was converted to mzML format using ProteoWizard (11) before imported into Mzmine (12) for data processing using ADAP chromatogram builder, Wavelets (ADAP) deconvolution, Deisotoping and Join alignment modules.

Features with < x5 average abundance in QC samples/blanks, not found in at least 80% of QC samples or in 50% of all samples were excluded. Remaining missing values were k-Nearest Neighbor imputed and QC signal normalized in MetaboAnalyst (13).

2-way and 3-way ANOVA was performed on raw metabolic features without further annotation. Features were annotated to Metabolomics Standard Initiative level 3 (82) using MS/MS spectra databases from National Institute of Standards and Technology 17 (NIST17) and MassBank of North America (MoNA). Metabolic pathway analysis was performed in MetaboAnalyst (83) on annotated BAT metabolites from the features displaying a significant interaction between genotype and time-of day. A joint pathway analysis was performed in MetaboAnalyst on the same metabolites and transcripts from the RNA sequencing analysis showing a significant difference in rhythmicity in response to *Nampt* deletion in BAT.

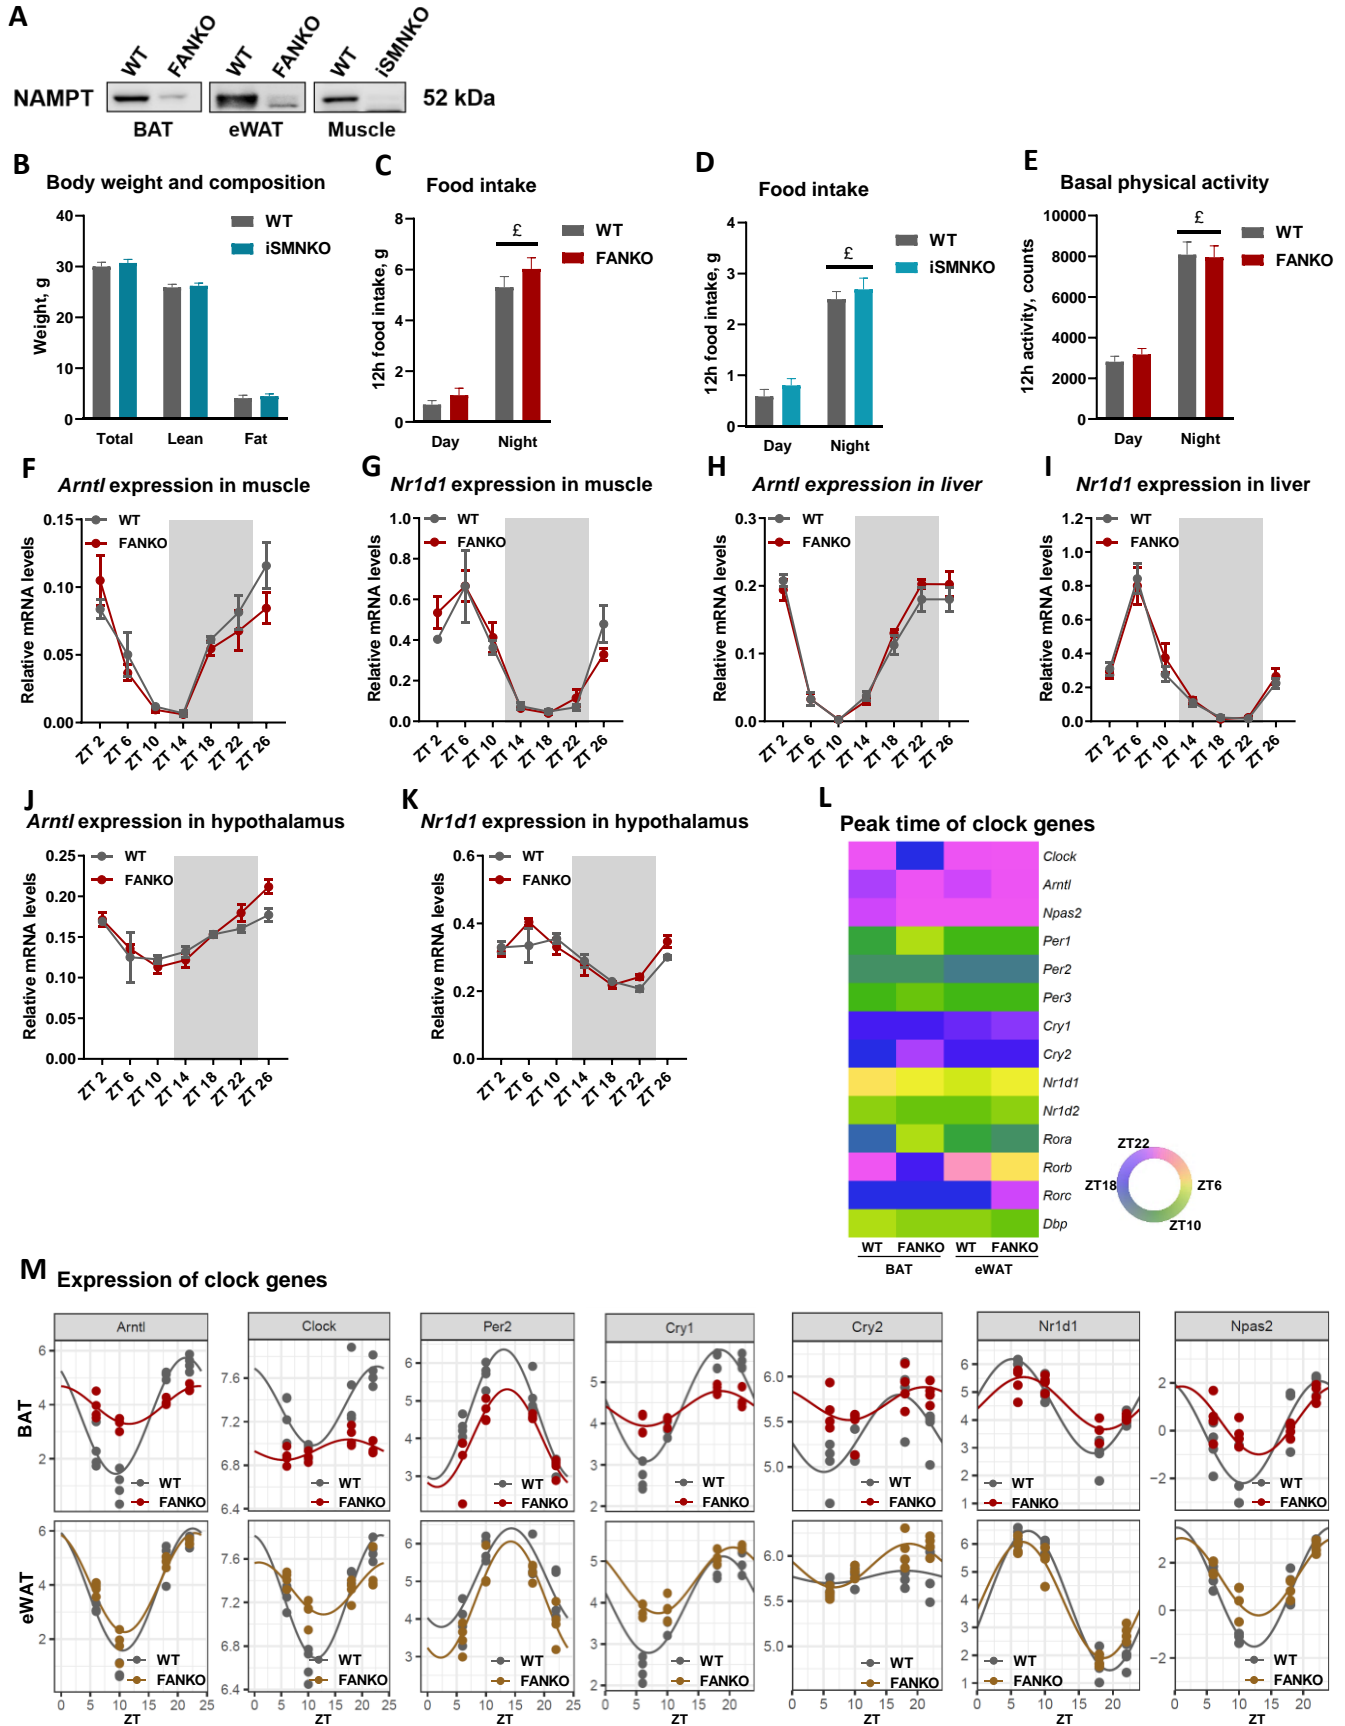

**Fig. S1. NAMPT-dependent NAD<sup>+</sup> levels regulate the molecular clock in a tissue-specific manner**

Supplemental data to Fig. 1. **(A)** Protein levels of NAMPT in BAT and eWAT of WT and FANKO mice, and in gastrocnemius muscle of WT and iSMNKO mice. **(B)** Bodyweight and composition in WT and iSMNKO mice. Food intake in **(C)** FANKO and **(D)** iSMNKO mice. **(E)** Basal physical activity in WT and FANKO mice. Circadian expression of *Arntl* and *Nr1d1* in **(F, G)** soleus, **(H, I)** liver and **(J, K)** hypothalamus of WT and FANKO mice from Fig. 1. Data from RNA sequencing performed on BAT and eWAT at ZT 6, 10, 18 and 22 from Fig. 1. (n = 4). **(L)** Heatmap of peak time of core clock genes, with **(M)** graphical examples of *Arntl*, *Clock*, *Per2*, *Cry1*, *Cry2*, *Nr1d1*, and *Npas2* expression. £ denotes significant difference between night and day.

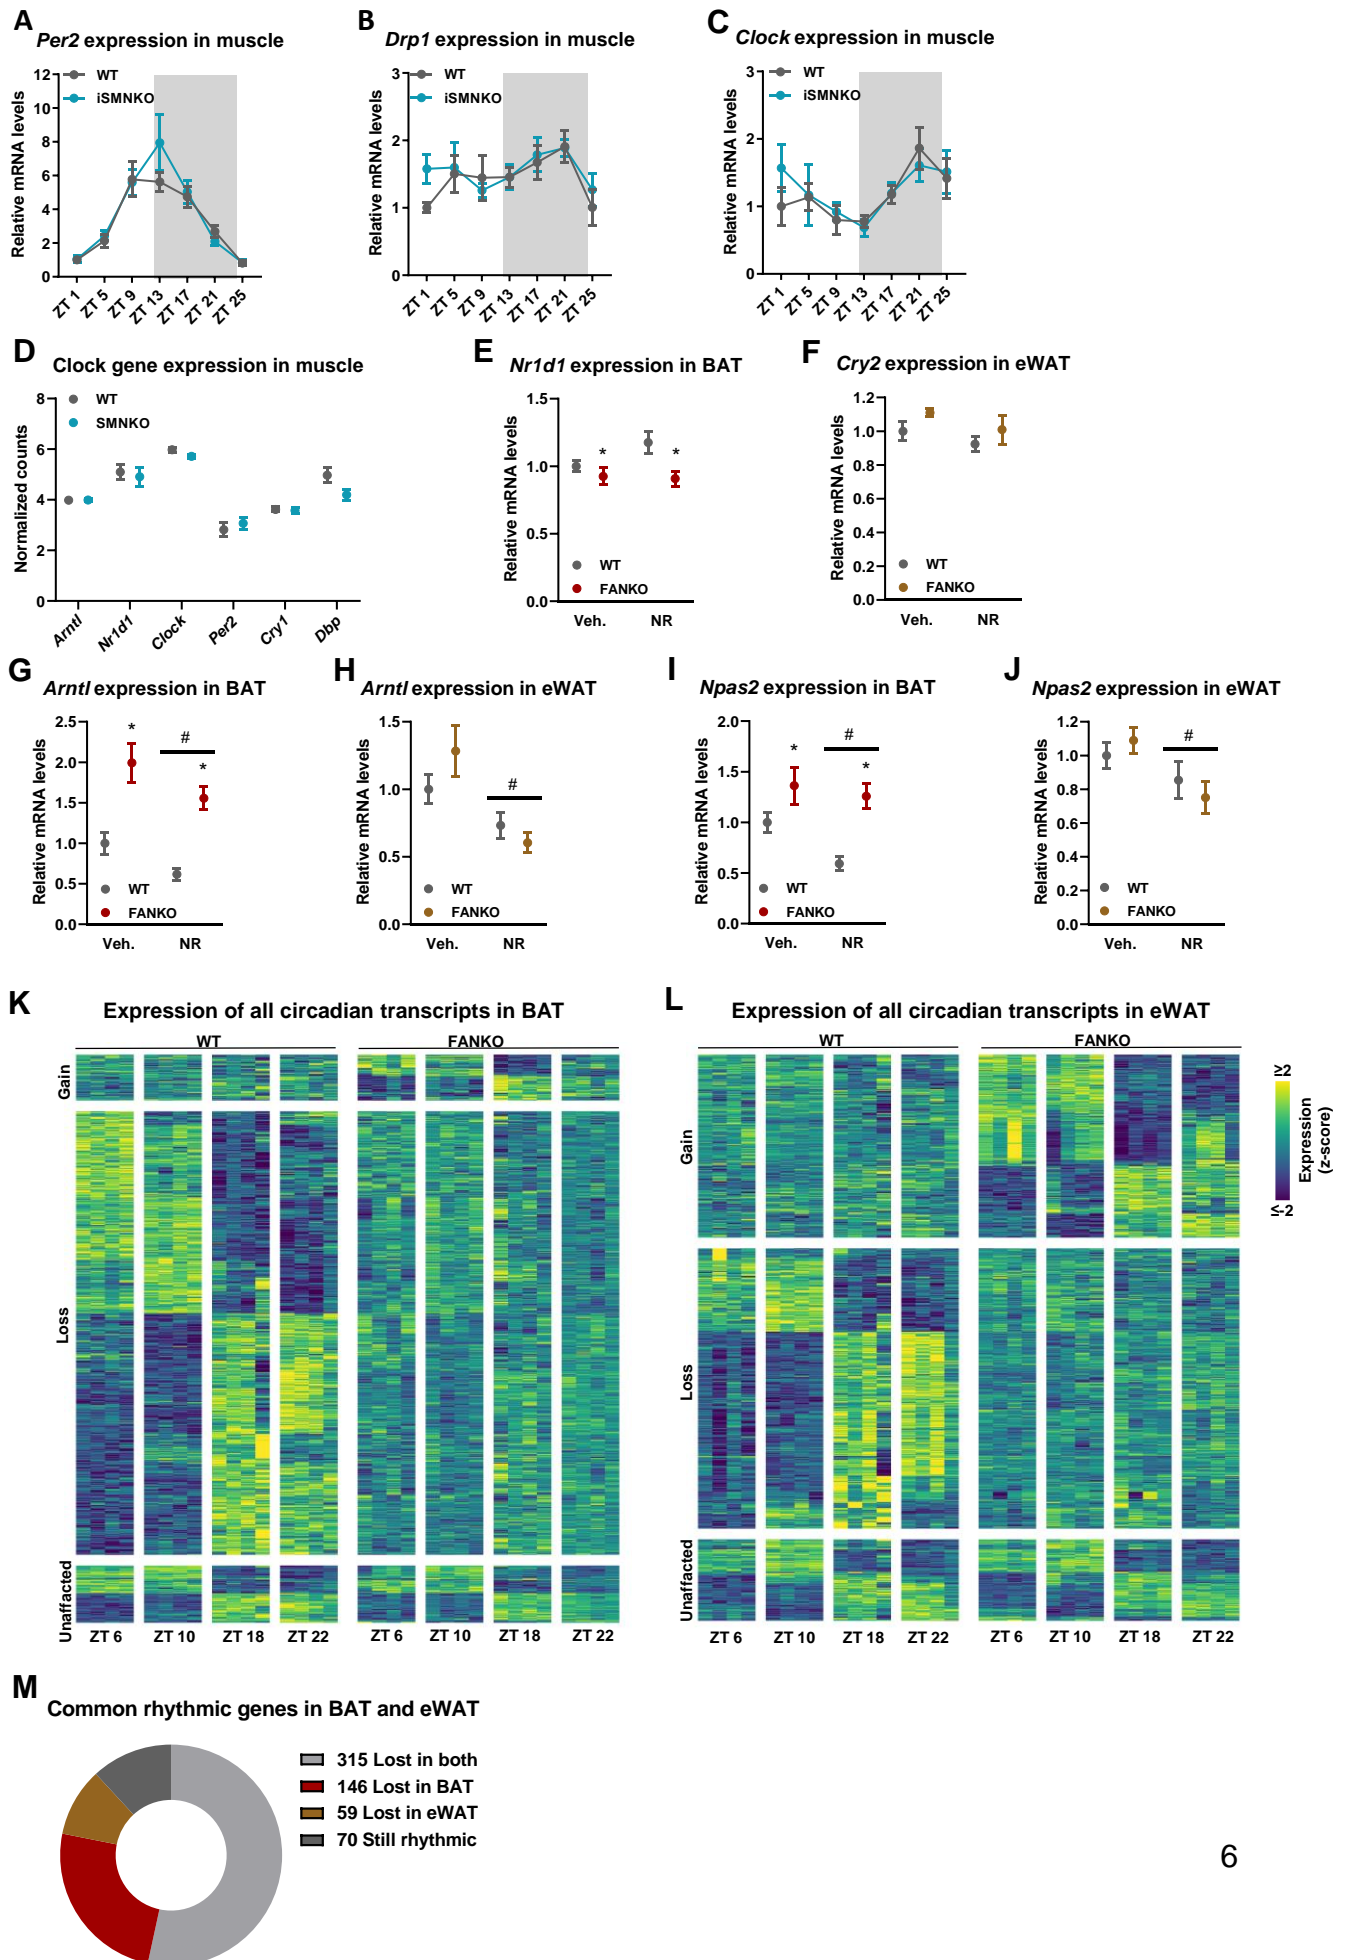

**Fig. S2. *Nampt* controls adipose transcriptional rhythmicity through changes in circadian amplitude**

Supplemental data to Fig. 1 and 2. Circadian expression of (A) *Per2*, (B) *Drp1*, and (C) *Clock* in gastrocnemius muscle of WT and iSMNKO mice from Fig. 1. (D) Expression of *Arntl*, *Nr1d1*, *Clock*, *Per2*, *Cry1*, and *Dbp* at ZT 4 in gastrocnemius muscle of WT and SMNKO mice. (E) *Nr1d1* expression in BAT after NR infusions in WT and FANKO mice (n = 5-6). (F) *Cry2* expression in eWAT after NR infusions (n = 5-6). *Arntl* expression in (G) BAT and (H) eWAT after NR infusions (n = 5-6). *Npas2* expression in (I) BAT and (J) eWAT after NR infusions (n = 5-6). Significant differences were found by 2-way ANOVA. \* denotes significant difference between WT and FANKO. # denotes significant difference with treatment. Heatmap of all rhythmic transcripts in (K) BAT and (L) eWAT of WT and FANKO mice. (M) Fate of common rhythmic genes in BAT and eWAT in response to *Nampt*-depletion.

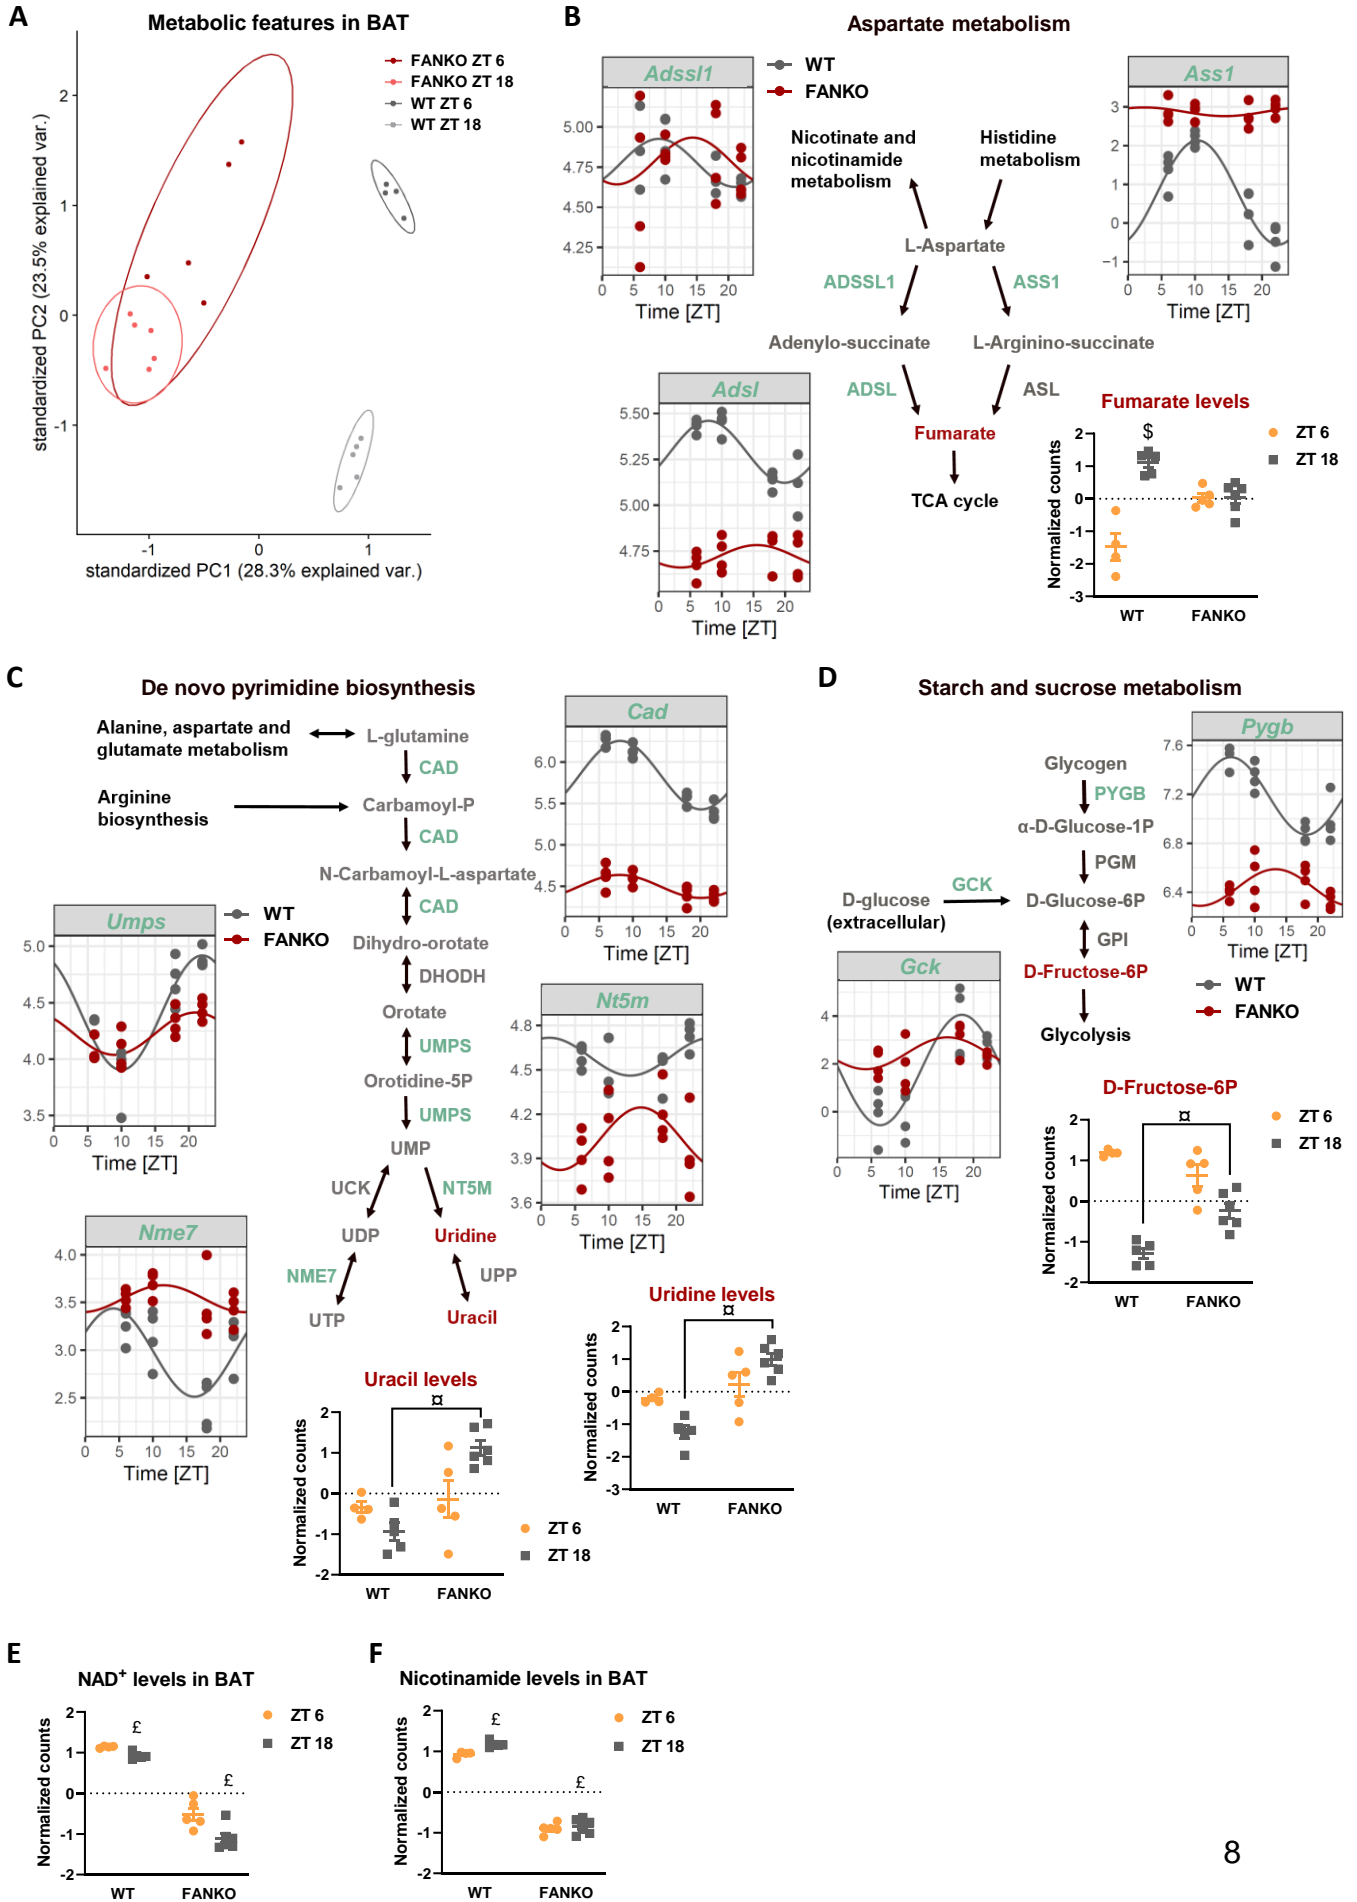



**Fig. S3. *Nampt* ablation affects metabolite rhythmicity in brown adipose tissue**

Supplemental data to Fig. 3. (A) Principal component analysis (PCA) of metabolomics data from BAT of WT and FANKO mice harvested at ZT 6 and ZT 18 (n = 4-6). Schematic overview of (B) aspartate metabolism, (C) de novo pyrimidine biosynthesis, and (D) starch and sucrose metabolism, and plots displaying the level of enzymatic transcripts (green) and metabolites (red) with significantly changed diurnal rhythm in BAT in response to *Nampt* deletion. Day and night levels of (E) NAD<sup>+</sup>, and (F) nicotinamide in BAT of WT and FANKO mice from the metabolomic analysis. \$ denotes significant difference with time-of-day in WT. α denotes significant difference between WT and FANKO at the same time-of-day. £ denotes a main effect of time-of-day.

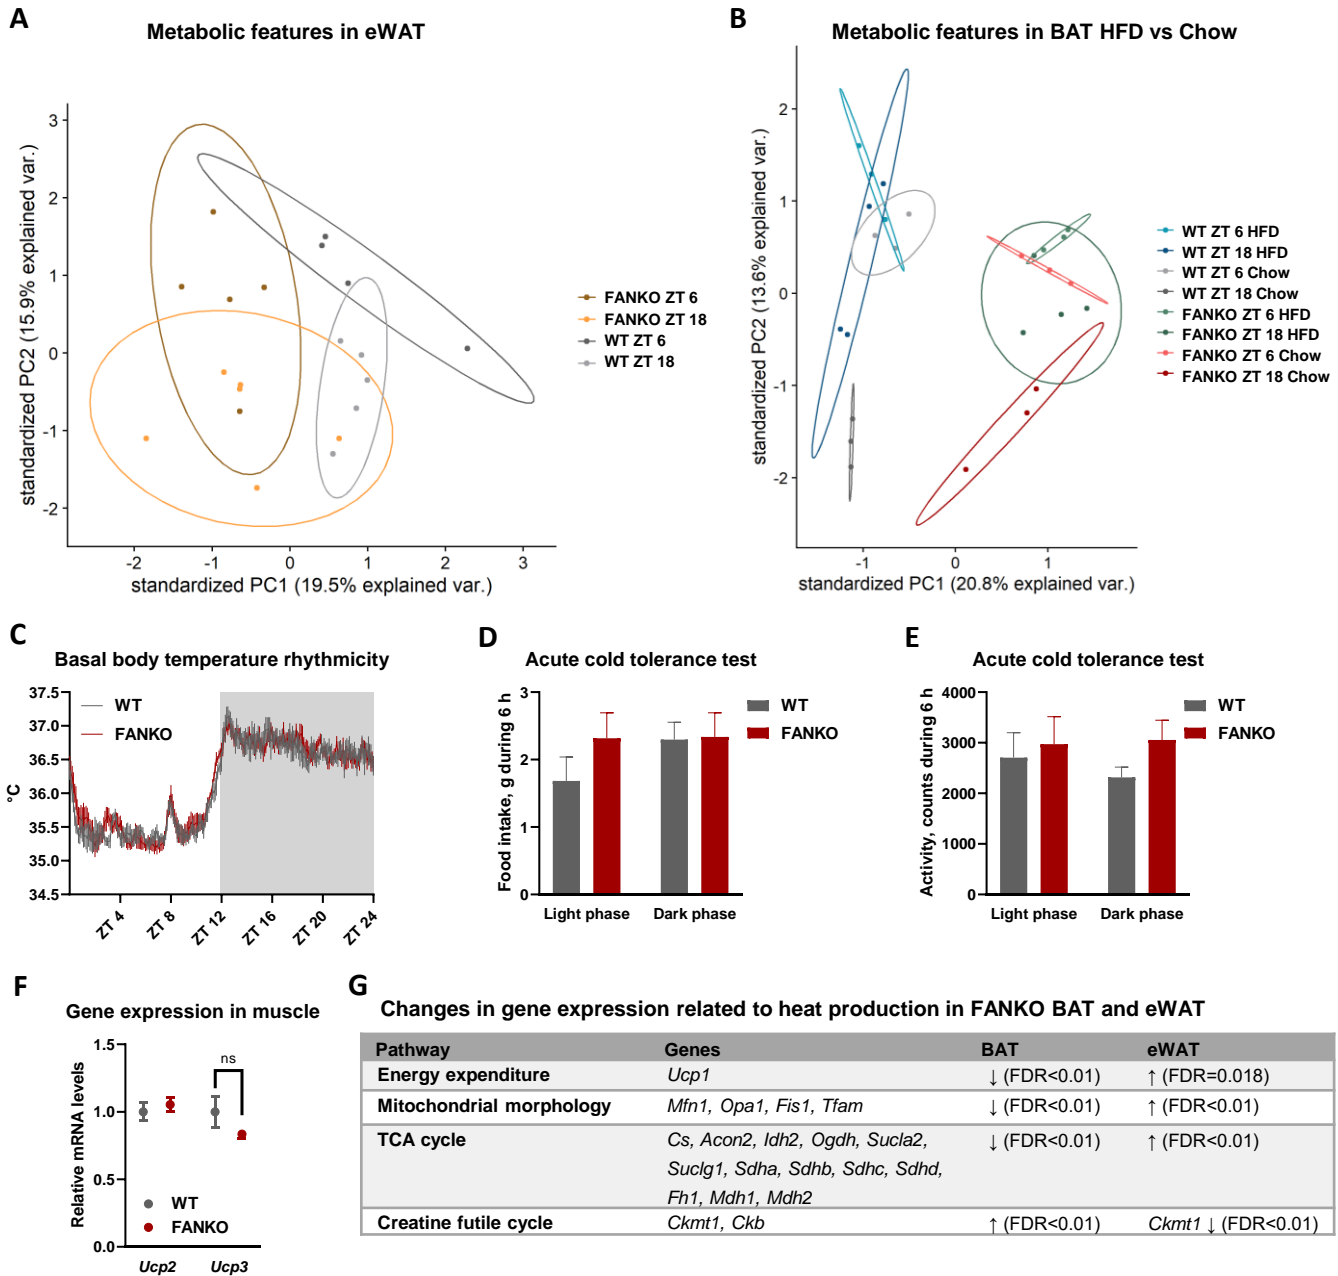

**Fig. S4. The effect of *Nampt* ablation on metabolite rhythmicity is tissue- and diet-dependent**  
 Supplemental data to Fig. 4. (A) PCA of metabolomics data from eWAT of WT and FANKO mice harvested at ZT 6 and ZT 18 (n = 4-6). (B) PCA of metabolomics data from BAT of chow- and HFD-fed WT and FANKO mice harvested at ZT 6 and ZT 18 (n = 2-4). (C) Basal body temperature rhythmicity in WT and FANKO mice. (D) Food intake and (E) basal activity during the two acute cold tolerance tests. (F) Expression of *Ucp2* and *Ucp3* at ZT 6 in gastrocnemius muscle of WT and FANKO mice. (G) Overview of changes in expression level of genes related to heat production in FANKO BAT and eWAT.

**Dataset S1:** Circadian transcripts in BAT and eWAT of WT and FANKO mice.

**Dataset S2:** Gene ontology enrichment analysis of the 590 common rhythmic genes in BAT and eWAT in Supplemental Fig. 2M. The genes are divided dependent on their response to *Nampt* deletion. Gene ontology terms mentioned in the Result section are highlighted with yellow.

**Dataset S3:** Gene ontology enrichment analysis of the rhythmic genes in BAT and eWAT of WT and FANKO mice. The four groups correspond to the two circles in Fig. 2B and the two circles in Fig. 2C. Gene ontology terms mentioned in the Result section are highlighted with yellow.

## SI References

1. A. L. Basse, *et al.*, Skeletal Muscle Insulin Sensitivity Show Circadian Rhythmicity Which Is Independent of Exercise Training Status. *Frontiers in Physiology* **9** (2018).
2. Y. Liao, G. K. Smyth, W. Shi, featureCounts: an efficient general purpose program for assigning sequence reads to genomic features. *Bioinformatics* **30**, 923–930 (2014).
3. M. D. Robinson, D. J. McCarthy, G. K. Smyth, edgeR: a Bioconductor package for differential expression analysis of digital gene expression data. *Bioinformatics* **26**, 139–140 (2010).
4. J. M. Singer, J. J. Hughey, LimoRhyde: A Flexible Approach for Differential Analysis of Rhythmic Transcriptome Data. *Journal of Biological Rhythms*, 074873041881378 (2018).
5. A. Alexa, J. Rahnenführer, T. Lengauer, Improved scoring of functional groups from gene expression data by decorrelating GO graph structure. *Bioinformatics* **22**, 1600–1607 (2006).
6. R. Kolde, Pheatmap: pretty heatmaps. *R package version 1*, 747 (2012).
7. J. R. Conway, A. Lex, N. Gehlenborg, UpSetR: An R package for the visualization of intersecting sets and their properties. *Bioinformatics* **33**, 2938–2940 (2017).
8. G. Yu, Enrichplot: visualization of functional enrichment result. *R package version 1* (2019).
9. Hadley. Wickham, *Ggplot2: elegant graphics for data analysis* (Springer, 2009).
10. E. G. Sustarsic, *et al.*, Cardiolipin Synthesis in Brown and Beige Fat Mitochondria Is Essential for Systemic Energy Homeostasis. *Cell Metabolism* **28**, 159-174.e11 (2018).
11. M. C. Chambers, *et al.*, A Cross-platform Toolkit for Mass Spectrometry and Proteomics. *Nat Biotechnol* **30**, 918–920 (2012).
12. T. Pluskal, S. Castillo, A. Villar-Briones, M. Oresic, MZmine 2: modular framework for processing, visualizing, and analyzing mass spectrometry-based molecular profile data. *BMC Bioinformatics* **11**, 395 (2010).
13. J. Chong, J. Xia, MetaboAnalystR: an R package for flexible and reproducible analysis of metabolomics data. *Bioinformatics* **34**, 4313–4314 (2018).
